# Supplementary material for: Risk of a subsequent diagnosis of inflammatory bowel disease in subjects with ophthalmic disorders associated with inflammatory bowel disease: a retrospective cohort analysis of UK primary care data
Source: HighWire-hosted journal article supplement (doi:10.1136/bmjopen-2021-052833), 2022-05-01

**Appendix 1****READ Codes:****Ulcerative Colitis:**

| Code    | Description                              |
|---------|------------------------------------------|
| J410z00 | Ulcerative proctocolitis NOS             |
| N031000 | Arthropathy in ulcerative colitis        |
| J41z.00 | Idiopathic proctocolitis NOS             |
| J41y.00 | Other idiopathic proctocolitis           |
| J412.00 | Ulcerative (chronic) ileocolitis         |
| J413.00 | Ulcerative pancolitis                    |
| Jyu4100 | [X]Other ulcerative colitis              |
| N045400 | Juvenile arthritis in ulcerative colitis |
| J410000 | Ulcerative ileocolitis                   |
| J411.00 | Ulcerative (chronic) enterocolitis       |
| J41..00 | Idiopathic proctocolitis                 |
| J410.00 | Ulcerative proctocolitis                 |
| J410300 | Ulcerative proctitis                     |
| J410400 | Exacerbation of ulcerative colitis       |
| J41..12 | Ulcerative colitis and/or proctitis      |
| J410100 | Ulcerative colitis                       |
| J410200 | Ulcerative rectosigmoiditis              |
| J41yz00 | Other idiopathic proctocolitis NOS       |

**Crohn's Disease:**

| Code    | Description                                      |
|---------|--------------------------------------------------|
| J400.00 | Regional enteritis of the small bowel            |
| J400000 | Regional enteritis of the duodenum               |
| J400100 | Regional enteritis of the jejunum                |
| J40..00 | Regional enteritis - Crohn's disease             |
| N031100 | Arthropathy in Crohn's disease                   |
| ZR3S.11 | CDAI - Crohn's disease activity index            |
| J402.00 | Regional ileocolitis                             |
| J401z11 | Crohn's colitis                                  |
| J400200 | Crohn's disease of the terminal ileum            |
| J400300 | Crohn's disease of the ileum unspecified         |
| J400400 | Crohn's disease of the ileum NOS                 |
| J400500 | Exacerbation - Crohn's disease - small intestine |
| J08z900 | Orofacial Crohn's disease                        |
| J400z00 | Crohn's disease of the small bowel NOS           |
| J40z.00 | Regional enteritis NOS                           |
| J401000 | Regional enteritis of the colon                  |
| J401100 | Regional enteritis of the rectum                 |
| J401200 | Exacerbation - Crohn's disease - large intestine |
| J40..12 | Granulomatous enteritis                          |
| J40..11 | Crohn's disease                                  |
| ZR3S.00 | Crohn's disease activity index                   |
| J401.00 | Regional enteritis of the large bowel            |
| J401z00 | Crohn's disease of the large bowel NOS           |
| Jyu4000 | [X]Other Crohn's disease                         |
| N045300 | Juvenile arthritis in Crohn's disease            |
| J40z.11 | Crohn's disease NOS                              |

**Ophthalmic Extraintestinal Manifestations (IBD associated Ocular Inflammation):**

| <b>Code</b> | <b>Description</b>                   |
|-------------|--------------------------------------|
| F443.11     | Uveitis NOS                          |
| F443000     | Anterior uveitis                     |
| F441200     | Chronic anterior uveitis             |
| F443.00     | Unspecified iridocyclitis            |
| F443100     | Iritis                               |
| F440z00     | Acute or subacute iritis NOS         |
| F442.00     | Certain types of iridocyclitis       |
| F442z00     | Certain types of cyclitis NOS        |
| F441z00     | Chronic iridocyclitis NOS            |
| F44..12     | Iridocyclitis                        |
| F441.00     | Chronic iridocyclitis                |
| F441.11     | Chronic iritis                       |
| F441000     | Unspecified chronic iridocyclitis    |
| F441100     | Chronic iridocyclitis due to disease |
| F440300     | Recurrent iridocyclitis              |
| F440500     | Secondary noninfected iridocyclitis  |
| F440000     | Unspecified acute iridocyclitis      |
| F440100     | Unspecified subacute iridocyclitis   |
| F440200     | Primary iridocyclitis                |
| F440.11     | Iritis - acute                       |
| F440.00     | Acute and subacute iridocyclitis     |
| F4K0z00     | Scleritis or episcleritis NOS        |
| F4K0.12     | Scleritis                            |
| F4K0.11     | Episcleritis                         |
| F4K0.00     | Scleritis and episcleritis           |
| FyuD800     | Scleritis+episcleritis in diseases   |
| F4K0700     | Posterior scleritis                  |
| F4K0000     | Unspecified scleritis                |
| F4K0200     | Nodular episcleritis                 |
| F4K0300     | Anterior scleritis                   |
| F4K0600     | Brawny scleritis                     |
| F4K0100     | Episcleritis periodica fugax         |

## Appendix 2. Multivariable Cox hazard models for IBD associated Ocular Inflammation

|                                                  | Inflammatory Bowel Disease |                           |      |         | Ulcerative colitis |                           |       | Crohn's Disease |      |                           |      |         |
|--------------------------------------------------|----------------------------|---------------------------|------|---------|--------------------|---------------------------|-------|-----------------|------|---------------------------|------|---------|
|                                                  | aHR                        | [95% Confidence Interval] |      | p-value | aHR                | [95% Confidence Interval] |       | p-value         | aHR  | [95% Confidence Interval] |      | p-value |
| All IAOs                                         | 2.25                       | 1.89                      | 2.68 | <0.001  | 1.65               | 1.30                      | 2.09  | <0.001          | 3.37 | 2.59                      | 4.40 | <0.001  |
| Sex (reference) Male                             | 1.00                       |                           |      |         | 1.00               |                           |       |                 | 1.00 |                           |      |         |
| Female                                           | 0.92                       | 0.77                      | 1.09 | 0.342   | 0.78               | 0.62                      | 0.98  | 0.030           | 1.17 | 0.89                      | 1.54 | 0.264   |
| Age Category (reference) <18 years               | 1.00                       |                           |      |         | 1.00               |                           |       |                 | 1.00 |                           |      |         |
| 18-30                                            | 1.75                       | 1.05                      | 2.92 | 0.033   | 1.76               | 0.83                      | 3.76  | 0.143           | 1.62 | 0.80                      | 3.27 | 0.181   |
| 30-40                                            | 1.42                       | 0.86                      | 2.35 | 0.167   | 1.93               | 0.94                      | 3.96  | 0.072           | 0.99 | 0.49                      | 2.01 | 0.971   |
| 40-50                                            | 1.02                       | 0.62                      | 1.69 | 0.933   | 1.54               | 0.75                      | 3.15  | 0.238           | 0.60 | 0.29                      | 1.24 | 0.171   |
| 50-60                                            | 1.22                       | 0.74                      | 2.01 | 0.439   | 1.75               | 0.86                      | 3.59  | 0.125           | 0.78 | 0.38                      | 1.60 | 0.504   |
| 60-70                                            | 1.01                       | 0.60                      | 1.70 | 0.975   | 1.46               | 0.70                      | 3.06  | 0.312           | 0.64 | 0.30                      | 1.36 | 0.246   |
| >70                                              | 0.76                       | 0.44                      | 1.31 | 0.320   | 1.02               | 0.47                      | 2.19  | 0.968           | 0.55 | 0.25                      | 1.19 | 0.129   |
| Smoking Status (reference) current smoker        | 1.00                       |                           |      |         | 1.00               |                           |       |                 | 1.00 |                           |      |         |
| non smoker                                       | 0.77                       | 0.63                      | 0.95 | 0.015   | 1.16               | 0.86                      | 1.56  | 0.334           | 0.48 | 0.36                      | 0.64 | <0.001  |
| Charlson comorbidity score (reference) 0         | 1.00                       |                           |      |         | 1.00               |                           |       |                 | 1.00 |                           |      |         |
| 1                                                | 1.11                       | 0.90                      | 1.37 | 0.313   | 1.14               | 0.86                      | 1.50  | 0.363           | 1.09 | 0.79                      | 1.50 | 0.616   |
| >=2                                              | 1.06                       | 0.78                      | 1.43 | 0.709   | 1.18               | 0.81                      | 1.73  | 0.386           | 0.89 | 0.54                      | 1.44 | 0.626   |
| Body mass index (reference) <25kg/m <sup>2</sup> | 1.00                       |                           |      |         | 1.00               |                           |       |                 | 1.00 |                           |      |         |
| 25-30Kg/m <sup>2</sup>                           | 0.95                       | 0.77                      | 1.18 | 0.658   | 0.88               | 0.67                      | 1.17  | 0.380           | 1.06 | 0.75                      | 1.49 | 0.752   |
| >30Kg/m <sup>2</sup>                             | 0.89                       | 0.69                      | 1.14 | 0.354   | 0.73               | 0.52                      | 1.03  | 0.074           | 1.14 | 0.78                      | 1.66 | 0.508   |
| Missing                                          | 0.87                       | 0.67                      | 1.14 | 0.311   | 0.78               | 0.55                      | 1.10  | 0.162           | 1.02 | 0.68                      | 1.54 | 0.908   |
| Townsend (least deprived – reference) 1          | 1.00                       |                           |      |         | 1.00               |                           |       |                 | 1.00 |                           |      |         |
| 2                                                | 1.08                       | 0.84                      | 1.39 | 0.545   | 1.15               | 0.83                      | 1.60  | 0.39            | 0.98 | 0.65                      | 1.47 | 0.919   |
| 3                                                | 1.11                       | 0.86                      | 1.44 | 0.424   | 1.20               | 0.86                      | 1.67  | 0.276           | 0.98 | 0.65                      | 1.48 | 0.932   |
| 4                                                | 0.92                       | 0.69                      | 1.22 | 0.571   | 0.84               | 0.57                      | 1.24  | 0.378           | 1.02 | 0.67                      | 1.55 | 0.929   |
| 5                                                | 0.94                       | 0.68                      | 1.30 | 0.689   | 0.87               | 0.55                      | 1.36  | 0.537           | 1.02 | 0.63                      | 1.63 | 0.948   |
| Missing                                          | 0.80                       | 0.59                      | 1.09 | 0.164   | 0.89               | 0.60                      | 1.31  | 0.545           | 0.69 | 0.42                      | 1.14 | 0.146   |
| Anaemia** (reference) no                         | 1.00                       |                           |      |         | 1.00               |                           |       |                 | 1.00 |                           |      |         |
| yes                                              | 1.68                       | 1.17                      | 2.42 | 0.005   | 1.20               | 0.69                      | 2.08  | 0.519           | 2.34 | 1.44                      | 3.81 | <0.001  |
| Abdominal pain† (reference) no                   | 1.00                       |                           |      |         | 1.00               |                           |       |                 | 1.00 |                           |      |         |
| yes                                              | 1.56                       | 0.99                      | 2.44 | 0.054   | 1.27               | 0.65                      | 2.47  | 0.488           | 1.94 | 1.05                      | 3.58 | 0.033   |
| Lower gastrointestinal bleeding† (reference) no  | 1.00                       |                           |      |         | 1.00               |                           |       |                 | 1.00 |                           |      |         |
| yes                                              | 6.45                       | 4.48                      | 9.29 | <0.001  | 8.13               | 5.23                      | 12.64 | <0.001          | 4.25 | 2.23                      | 8.11 | <0.001  |
| Loperamide prescription† (reference) no          | 1.00                       |                           |      |         | 1.00               |                           |       |                 | 1.00 |                           |      |         |
| yes                                              | 2.09                       | 1.34                      | 3.27 | 0.001   | 2.44               | 1.34                      | 4.44  | 0.004           | 1.82 | 0.94                      | 3.52 | 0.077   |
| Diarrhoea† (reference) no                        | 1.00                       |                           |      |         | 1.00               |                           |       |                 | 1.00 |                           |      |         |
| yes                                              | 4.46                       | 3.25                      | 6.13 | <0.001  | 3.37               | 2.12                      | 5.34  | <0.001          | 5.99 | 3.87                      | 9.27 | <0.001  |
| Axial arthropathy* (reference) no                | 1.00                       |                           |      |         | 1.00               |                           |       |                 | 1.00 |                           |      |         |
| yes                                              | 2.77                       | 1.77                      | 4.36 | <0.001  | 2.49               | 1.32                      | 4.71  | 0.005           | 3.15 | 1.66                      | 5.99 | <0.001  |

† coded within 6 months of Index date; ‡ <11.9g/dL (females); <12.9g/dL (males); \*recorded at baseline  
EIM: extraintestinal manifestations

## Appendix 3. Demographic details of the anterior uveitis and episcleritis &amp; scleritis cohorts and their controls

|                                                        | Anterior uveitis subjects | Matched subjects without anterior uveitis | Episcleritis & Scleritis subjects | Matched subjects without episcleritis & scleritis |
|--------------------------------------------------------|---------------------------|-------------------------------------------|-----------------------------------|---------------------------------------------------|
| <b>Number of subjects</b>                              | 22,547                    | 89,422                                    | 17,439                            | 68,823                                            |
| <b>Median py of follow-up (IQR)</b>                    | 5.1 (2.3-9.1)             | 4.9 (2.2-8.9)                             | 5.9 (2.7-9.8)                     | 5.5 (2.4-9.5)                                     |
| <b>Median age (IQR)</b>                                | 53 (39-68)                | 52 (38-67)                                | 48 (36-61)                        | 47 (35-59)                                        |
| <b>Age category (%)</b>                                |                           |                                           |                                   |                                                   |
| <18 years                                              | 887 (3.9)                 | 3,952 (4.3)                               | 1266 (7.3)                        | 5223 (7.6)                                        |
| 18-30                                                  | 1,934 (8.5)               | 8,239 (9.1)                               | 1403 (8.1)                        | 5994 (8.7)                                        |
| 30-40                                                  | 3171 (13.6)               | 12,690 (14.0)                             | 2702 (15.5)                       | 11494 (16.7)                                      |
| 40-50                                                  | 3,071 (17.7)              | 16,373 (18.2)                             | 3859 (22.1)                       | 15480 (22.5)                                      |
| 50-60                                                  | 4,020 (17.7)              | 15,933 (17.8)                             | 3521 (20.2)                       | 13915 (20.2)                                      |
| 60-70                                                  | 3,587 (15.8)              | 14,051 (15.7)                             | 2667 (15.3)                       | 10026 (14.6)                                      |
| >70                                                    | 5,190 (22.8)              | 18,341 (21.0)                             | 2021 (11.6)                       | 6691 (9.7)                                        |
| <b>Female sex (%)</b>                                  | 12,145 (53.5)             | 47,868 (53.4)                             | 10860 (62.3)                      | 42939 (62.4)                                      |
| <b>Townsend Index (%)</b>                              |                           |                                           |                                   |                                                   |
| 1 - least deprived                                     | 4,822 (21.3)              | 19,181 (21.4)                             | 4381 (25.1)                       | 16706 (24.3)                                      |
| 2                                                      | 4,316 (19.0)              | 17,162 (19.1)                             | 3479 (20.0)                       | 13279 (19.3)                                      |
| 3                                                      | 4,058 (17.9)              | 15,946 (17.8)                             | 3181 (18.2)                       | 12636 (18.4)                                      |
| 4                                                      | 3,577 (15.8)              | 13,811 (15.4)                             | 2480 (14.2)                       | 10281 (14.9)                                      |
| 5                                                      | 2,498 (11.0)              | 9,652 (10.8)                              | 1444 (8.3)                        | 6051 (8.8)                                        |
| missing                                                | 3,428 (15.1)              | 13,827 (15.4)                             | 2474 (14.2)                       | 9870 (14.3)                                       |
| <b>Charlson comorbidity score (%)</b>                  |                           |                                           |                                   |                                                   |
| 0                                                      | 13,574 (59.8)             | 60,673 (67.7)                             | 11671 (66.9)                      | 49861 (72.5)                                      |
| 1                                                      | 5,033 (22.2)              | 17,263 (19.3)                             | 3697 (21.2)                       | 12641 (18.4)                                      |
| >/=2                                                   | 4,092 (18.0)              | 11,643 (13.0)                             | 2071 (11.9)                       | 6321 (9.2)                                        |
| <b>Smoking status (%)</b>                              |                           |                                           |                                   |                                                   |
| current smoker                                         | 4,126 (18.2)              | 16,754 (18.7)                             | 2738 (15.7)                       | 13079 (19.0)                                      |
| non- smoker                                            | 18,573 (81.8)             | 72,825 (81.3)                             | 14701 (84.3)                      | 55744 (81.0)                                      |
| <b>Body mass index (%)</b>                             |                           |                                           |                                   |                                                   |
| <25kg/m2                                               | 7,344 (32.4)              | 29,447 (32.9)                             | 5908 (33.9)                       | 23455 (34.1)                                      |
| 25-30Kg/m2                                             | 6,709 (29.5)              | 24,625 (27.4)                             | 4940 (28.3)                       | 17708 (25.7)                                      |
| >30Kg/m2                                               | 4,661 (20.6)              | 16,187 (18.1)                             | 3322 (19.1)                       | 11885 (17.3)                                      |
| missing                                                | 3,985 (17.6)              | 19,320 (21.6)                             | 3269 (18.8)                       | 15775 (22.9)                                      |
| <b>Anaemia<sup>††</sup> (%)</b>                        | 1,490 (6.5)               | 3,503 (3.9)                               | 691 (4.0)                         | 2126 (3.1)                                        |
| <b>Abdominal pain<sup>†</sup> (%)</b>                  | 469 (2.1)                 | 1,421 (1.6)                               | 402 (2.3)                         | 1212 (1.8)                                        |
| <b>Lower gastrointestinal bleeding<sup>†</sup> (%)</b> | 204 (0.9)                 | 642 (0.7)                                 | 172 (1.0)                         | 446 (0.7)                                         |
| <b>Loperamide prescription<sup>†</sup> (%)</b>         | 367 (1.6)                 | 988 (1.1)                                 | 213 (1.2)                         | 555 (0.8)                                         |
| <b>Diarrohea<sup>†</sup> (%)</b>                       | 552 (2.4)                 | 1,441 (1.6)                               | 459 (2.6)                         | 1073 (1.6)                                        |
| <b>B27 positive at Index</b>                           | 34 (0.2)                  | 2 (0.0)                                   | 3 (0.02)                          | 5 (0.01)                                          |
| <b>Axial arthropathy at baseline</b>                   | 734 (3.2)                 | 588 (0.7)                                 | 221 (1.3)                         | 494 (0.7)                                         |

<sup>†</sup> coded within 6 months of Index date

<sup>‡</sup> <11.9g/dL (females); <12.9g/dL (males)

## Appendix 4. Multivariable Cox hazard models for anterior uveitis associated with inflammatory bowel disease

|                                                             | Inflammatory Bowel Disease |                           |      |         | Ulcerative colitis |                           |       |         | Crohn's Disease |                           |       |         |
|-------------------------------------------------------------|----------------------------|---------------------------|------|---------|--------------------|---------------------------|-------|---------|-----------------|---------------------------|-------|---------|
|                                                             | aHR                        | [95% Confidence Interval] |      | p-value | aHR                | [95% Confidence Interval] |       | p-value | aHR             | [95% Confidence Interval] |       | p-value |
| Anterior uveitis                                            | 3.39                       | 2.70                      | 4.25 | <0.001  | 2.23               | 1.63                      | 3.04  | <0.001  | 5.77            | 4.04                      | 8.24  | <0.001  |
| Sex (reference) Male                                        | 1.00                       |                           |      |         | 1.00               |                           |       |         | 1.00            |                           |       |         |
| Female                                                      | 0.81                       | 0.65                      | 1.02 | 0.077   | 0.75               | 0.56                      | 1.02  | 0.067   | 0.89            | 0.63                      | 1.26  | 0.500   |
| Age Category (reference) <18 years                          | 1.00                       |                           |      |         | No <18 cases       | -                         | -     | -       | 1.00            |                           |       |         |
| 18-30                                                       | 2.60                       | 1.07                      | 6.35 | 0.035   | 1.00 (reference)   |                           |       |         |                 | 1.46                      | 0.56  | 3.810   |
| 30-40                                                       | 2.25                       | 0.93                      | 5.40 | 0.07    | 1.45               | 0.73                      | 2.92  | 0.291   | 0.89            | 0.34                      | 2.34  | 0.815   |
| 40-50                                                       | 1.56                       | 0.65                      | 3.77 | 0.321   | 1.22               | 0.61                      | 2.42  | 0.572   | 0.48            | 0.18                      | 1.30  | 0.148   |
| 50-60                                                       | 1.91                       | 0.79                      | 4.60 | 0.149   | 1.38               | 0.69                      | 2.73  | 0.361   | 0.66            | 0.25                      | 1.76  | 0.407   |
| 60-70                                                       | 1.36                       | 0.55                      | 3.35 | 0.501   | 1.21               | 0.60                      | 2.46  | 0.599   | 0.33            | 0.11                      | 0.96  | 0.041   |
| >70                                                         | 1.05                       | 0.42                      | 2.62 | 0.909   | 0.96               | 0.46                      | 1.99  | 0.913   | 0.24            | 0.08                      | 0.71  | 0.01    |
| Smoking Status (reference) current smoker                   | 1.00                       |                           |      |         | 1.00               |                           |       |         | 1.00            |                           |       |         |
| non smoker                                                  | 0.86                       | 0.65                      | 1.13 | 0.282   | 1.32               | 0.88                      | 1.99  | 0.185   | 0.55            | 0.38                      | 0.80  | 0.002   |
| Charlson comorbidity score (reference) 0                    | 1.00                       |                           |      |         | 1.00               |                           |       |         | 1.00            |                           |       |         |
| 1                                                           | 0.93                       | 0.70                      | 1.24 | 0.621   | 1.02               | 0.70                      | 1.50  | 0.914   | 0.84            | 0.54                      | 1.30  | 0.434   |
| >=2                                                         | 0.99                       | 0.68                      | 1.45 | 0.955   | 1.06               | 0.66                      | 1.73  | 0.799   | 0.90            | 0.49                      | 1.67  | 0.748   |
| Body mass index (reference) <25kg/m <sup>2</sup>            | 1.00                       |                           |      |         | 1.00               |                           |       |         | 1.00            |                           |       |         |
| 25-30Kg/m <sup>2</sup>                                      | 1.11                       | 0.84                      | 1.46 | 0.48    | 0.91               | 0.63                      | 1.31  | 0.598   | 1.44            | 0.94                      | 2.21  | 0.09    |
| >30Kg/m <sup>2</sup>                                        | 0.82                       | 0.58                      | 1.16 | 0.271   | 0.73               | 0.47                      | 1.15  | 0.175   | 0.95            | 0.55                      | 1.63  | 0.853   |
| Missing                                                     | 0.83                       | 0.58                      | 1.17 | 0.289   | 0.81               | 0.51                      | 1.27  | 0.357   | 0.88            | 0.52                      | 1.52  | 0.653   |
| Townsend (least deprived – reference) 1                     | 1.00                       |                           |      |         | 1.00               |                           |       |         | 1.00            |                           |       |         |
| 2                                                           | 1.05                       | 0.75                      | 1.47 | 0.786   | 1.14               | 0.72                      | 1.82  | 0.567   | 0.94            | 0.57                      | 1.56  | 0.811   |
| 3                                                           | 1.04                       | 0.73                      | 1.48 | 0.813   | 1.17               | 0.72                      | 1.88  | 0.525   | 0.91            | 0.54                      | 1.54  | 0.734   |
| 4                                                           | 1.14                       | 0.80                      | 1.62 | 0.475   | 1.33               | 0.82                      | 2.16  | 0.241   | 0.95            | 0.56                      | 1.61  | 0.86    |
| 5                                                           | 0.78                       | 0.50                      | 1.22 | 0.273   | 0.86               | 0.46                      | 1.62  | 0.647   | 0.69            | 0.37                      | 1.31  | 0.262   |
| Missing                                                     | 0.76                       | 0.50                      | 1.15 | 0.196   | 1.08               | 0.65                      | 1.82  | 0.759   | 0.44            | 0.22                      | 0.90  | 0.024   |
| Anaemia** (reference) no                                    | 1.00                       |                           |      |         | 1.00               |                           |       |         | 1.00            |                           |       |         |
| yes                                                         | 1.70                       | 1.07                      | 2.69 | 0.024   | 1.36               | 0.70                      | 2.63  | 0.364   | 2.19            | 1.15                      | 4.17  | 0.017   |
| Abdominal pain <sup>†</sup> (reference) no                  | 1.00                       |                           |      |         | 1.00               |                           |       |         | 1.00            |                           |       |         |
| yes                                                         | 1.62                       | 0.92                      | 2.86 | 0.096   | 1.17               | 0.47                      | 2.89  | 0.737   | 2.16            | 1.04                      | 4.49  | 0.039   |
| Lower gastrointestinal bleeding <sup>†</sup> (reference) no | 1.00                       |                           |      |         | 1.00               |                           |       |         | 1.00            |                           |       |         |
| yes                                                         | 5.97                       | 3.71                      | 9.62 | 0<0.001 | 6.73               | 3.60                      | 12.57 | <0.001  | 5.29            | 2.54                      | 11.03 | <0.001  |
| Loperamide prescription <sup>†</sup> (reference) no         | 1.00                       |                           |      |         | 1.00               |                           |       |         | 1.00            |                           |       |         |
| yes                                                         | 2.13                       | 1.22                      | 3.72 | 0.007   | 3.19               | 1.53                      | 6.64  | 0.002   | 1.46            | 0.63                      | 3.35  | 0.376   |
| Diarrhoea <sup>†</sup> (reference) no                       | 1.00                       |                           |      |         | 1.00               |                           |       |         | 1.00            |                           |       |         |
| yes                                                         | 4.87                       | 3.23                      | 7.36 | <0.001  | 2.72               | 1.42                      | 5.21  | 0.003   | 8.01            | 4.74                      | 13.55 | <0.001  |
| Axial arthropathy* (reference) no                           | 1.00                       |                           |      |         | 1.00               |                           |       |         | 1.00            |                           |       |         |
| yes                                                         | 2.08                       | 0.58                      | 2.64 | 0.008   | 1.45               | 0.59                      | 3.56  | 0.421   | 2.75            | 1.38                      | 5.50  | 0.004   |

<sup>†</sup> coded within 6 months of Index date; ‡ <11.9g/dL (females); <12.9g/dL (males); \*recorded at baseline

## Appendix 5. Multivariable Cox hazard models for episcleritis &amp; scleritis associated with inflammatory bowel disease

|                                                  | Inflammatory Bowel Disease |                           |             |                  | Ulcerative colitis        |             |             |                           | Crohn's Disease |             |             |                  |
|--------------------------------------------------|----------------------------|---------------------------|-------------|------------------|---------------------------|-------------|-------------|---------------------------|-----------------|-------------|-------------|------------------|
|                                                  | aHR                        | [95% Confidence Interval] | p-value     | aHR              | [95% Confidence Interval] | p-value     | aHR         | [95% Confidence Interval] | p-value         |             |             |                  |
| Combined episcleritis & scleritis                | <b>1.73</b>                | <b>1.31</b>               | <b>2.28</b> | <b>&lt;0.001</b> | <b>1.43</b>               | <b>0.97</b> | <b>2.11</b> | <b>0.067</b>              | <b>2.13</b>     | <b>1.42</b> | <b>3.19</b> | <b>&lt;0.001</b> |
| Sex (reference) Male                             | 1.00                       |                           |             |                  | 1.00                      |             |             |                           | 1.00            |             |             |                  |
| Female                                           | 1.05                       | 0.79                      | 1.38        | 0.749            | 1.03                      | 0.71        | 1.49        | 0.887                     | 1.07            | 0.71        | 1.62        | 0.743            |
| Age Category (reference) <18 years               | 1.00                       |                           |             |                  | 1.00                      | 0.23        | 2.10        | 0.521                     | 1.00            |             |             |                  |
| 18-30                                            | 1.11                       | 0.52                      | 2.36        | 0.786            | 1.00                      |             |             |                           | 0.80            | 0.28        | 2.30        | 0.683            |
| 30-40                                            | 1.02                       | 0.51                      | 2.03        | 0.956            | 1.12                      | 0.49        | 2.55        | 0.796                     | 0.60            | 0.22        | 1.62        | 0.317            |
| 40-50                                            | 1.11                       | 0.57                      | 2.17        | 0.749            | 1.43                      | 0.66        | 3.09        | 0.369                     | 0.51            | 0.19        | 1.36        | 0.179            |
| 50-60                                            | 1.12                       | 0.57                      | 2.19        | 0.749            | 0.81                      | 0.35        | 1.87        | 0.620                     | 0.97            | 0.38        | 2.51        | 0.955            |
| 60-70                                            | 1.45                       | 0.73                      | 2.87        | 0.292            | 1.68                      | 0.75        | 3.76        | 0.207                     | 0.79            | 0.29        | 2.14        | 0.637            |
| >70                                              | 0.65                       | 0.28                      | 1.49        | 0.306            | 0.89                      | 0.33        | 2.38        | 0.817                     | 0.26            | 0.07        | 0.99        | 0.049            |
| Smoking Status (reference) current smoker        | 1.00                       |                           |             |                  | 1.00                      |             |             |                           | 1.00            |             |             |                  |
| non smoker                                       | 0.83                       | 0.60                      | 1.16        | 0.277            | 0.98                      | 0.62        | 1.56        | 0.941                     | 0.70            | 0.44        | 1.11        | 0.129            |
| Charlson comorbidity score (reference) 0         | 1.00                       |                           |             |                  | 1.00                      |             |             |                           | 1.00            |             |             |                  |
| 1                                                | 1.15                       | 0.83                      | 1.58        | 0.402            | 1.15                      | 0.75        | 1.78        | 0.524                     | 1.14            | 0.71        | 1.84        | 0.587            |
| >=2                                              | 0.82                       | 0.49                      | 1.38        | 0.465            | 0.83                      | 0.42        | 1.66        | 0.603                     | 0.82            | 0.38        | 1.79        | 0.626            |
| Body mass index (reference) <25kg/m <sup>2</sup> | 1.00                       |                           |             |                  | 1.00                      |             |             |                           | 1.00            |             |             |                  |
| 25-30Kg/m <sup>2</sup>                           | 0.96                       | 0.69                      | 1.33        | 0.800            | 0.76                      | 0.48        | 1.21        | 0.249                     | 1.21            | 0.76        | 1.94        | 0.418            |
| >30Kg/m <sup>2</sup>                             | 0.71                       | 0.47                      | 1.07        | 0.103            | 0.86                      | 0.51        | 1.44        | 0.561                     | 0.53            | 0.27        | 1.05        | 0.071            |
| Missing                                          | 0.98                       | 0.65                      | 1.46        | 0.912            | 1.12                      | 0.67        | 1.86        | 0.675                     | 0.80            | 0.42        | 1.53        | 0.495            |
| Townsend (least deprived – reference) 1          | 1.00                       |                           |             |                  | 1.00                      |             |             |                           | 1.00            |             |             |                  |
| 2                                                | 1.15                       | 0.78                      | 1.71        | 0.479            | 1.10                      | 0.67        | 1.79        | 0.713                     | 1.26            | 0.64        | 2.47        | 0.497            |
| 3                                                | 1.78                       | 1.24                      | 2.58        | 0.002            | 1.27                      | 0.78        | 2.07        | 0.334                     | 2.80            | 1.56        | 5.03        | 0.001            |
| 4                                                | 1.05                       | 0.67                      | 1.65        | 0.836            | 0.58                      | 0.29        | 1.15        | 0.117                     | 1.98            | 1.02        | 3.84        | 0.044            |
| 5                                                | 0.76                       | 0.41                      | 1.41        | 0.389            | 0.44                      | 0.17        | 1.14        | 0.092                     | 1.38            | 0.59        | 3.25        | 0.459            |
| Missing                                          | 0.89                       | 0.55                      | 1.44        | 0.629            | 0.89                      | 0.49        | 1.62        | 0.710                     | 0.88            | 0.38        | 2.04        | 0.765            |
| Anaemia** (reference) no                         | 1.00                       |                           |             |                  | 1.00                      |             |             |                           | 1.00            |             |             |                  |
| yes                                              | 2.02                       | 1.14                      | 3.58        | 0.016            | 1.02                      | 0.37        | 2.81        | 0.965                     | 3.36            | 1.66        | 6.80        | 0.001            |
| Abdominal pain† (reference) no                   | 1.00                       |                           |             |                  | 1.00                      |             |             |                           | 1.00            |             |             |                  |
| yes                                              | 1.08                       | 0.48                      | 2.45        | 0.846            | 1.01                      | 0.32        | 3.21        | 0.981                     | 1.17            | 0.37        | 3.70        | 0.794            |
| Lower gastrointestinal bleeding† (reference) no  | 1.00                       |                           |             |                  | 1.00                      |             |             |                           | 1.00            |             |             |                  |
| yes                                              | 5.18                       | 2.71                      | 9.93        | <0.001           | 6.71                      | 3.06        | 14.71       | <0.001                    | 3.26            | 1.01        | 10.50       | 0.048            |
| Loperamide prescription† (reference) no          | 1.00                       |                           |             |                  | 1.00                      |             |             |                           | 1.00            |             |             |                  |
| yes                                              | 2.97                       | 1.47                      | 6.02        | 0.002            | 2.89                      | 1.11        | 7.53        | 0.030                     | 3.19            | 1.14        | 8.95        | 0.027            |
| Diarrhoea† (reference) no                        | 1.00                       |                           |             |                  | 1.00                      |             |             |                           | 1.00            |             |             |                  |
| yes                                              | 3.01                       | 1.72                      | 5.26        | <0.001           | 3.19                      | 1.50        | 6.77        | 0.003                     | 2.76            | 1.21        | 6.32        | 0.016            |
| Axial arthropathy* (reference) no                | 1.00                       |                           |             |                  | 1.00                      |             |             |                           | 1.00            |             |             |                  |
| yes                                              | 2.96                       | 1.31                      | 6.68        | 0.009            | 4.50                      | 1.83        | 11.08       | 0.001                     | 1.07            | 0.15        | 7.67        | 0.949            |

† coded within 6 months of Index date; ‡ <11.9g/dL (females); <12.9g/dL (males); \*recorded at baseline

## Appendix 6

**Adjusted hazard ratios for risk of inflammatory bowel disease for complete case analysis  
(all-case analysis estimates are in brackets)**

|                                               | aHR         | [95% Confidence Interval] |      | p-value |
|-----------------------------------------------|-------------|---------------------------|------|---------|
| <b>Any IBD associated ocular inflammation</b> |             |                           |      |         |
| Inflammatory bowel disease                    | 2.29 (2.25) | 1.86                      | 2.80 | <0.001  |
| Ulcerative colitis                            | 1.43 (1.65) | 1.07                      | 1.90 | 0.015   |
| Crohn's disease                               | 3.95 (3.37) | 2.88                      | 5.41 | <0.001  |
| <b>Anterior uveitis</b>                       |             |                           |      |         |
| Inflammatory bowel disease                    | 3.49 (3.39) | 2.69                      | 4.51 | <0.001  |
| Ulcerative colitis                            | 2.05 (2.23) | 1.43                      | 2.96 | <0.001  |
| Crohn's disease                               | 6.52 (5.77) | 4.35                      | 9.79 | <0.001  |
| <b>Episcleritis or scleritis</b>              |             |                           |      |         |
| Inflammatory bowel disease                    | 1.56 (1.73) | 1.12                      | 2.18 | 0.009   |
| Ulcerative colitis                            | 1.20 (1.43) | 0.74                      | 1.94 | 0.459   |
| Crohn's disease                               | 2.04 (2.13) | 1.28                      | 3.27 | 0.003   |

Adjusted hazard ratio (aHR) – adjustment variables: age at index; sex; Townsend deprivation quintile; Charlson comorbidity score; body mass index; smoking status; anaemia, abdominal pain, lower gastrointestinal bleeding, loperamide prescription, diarrhoea, axial arthropathy.

**Complete case numbers (excludes subjects with missing BMI and Townsend level data)**

| <b>Any IBD associated ocular inflammation</b>                                | <b>Anterior Uveitis</b>       | <b>Episcleritis or Scleritis</b>                     |
|------------------------------------------------------------------------------|-------------------------------|------------------------------------------------------|
| Subjects without IAOI<br>100,826                                             | Subjects without AU<br>60,835 | Subjects without episcleritis or scleritis<br>45,477 |
| Subjects with any IAOI<br>26,954                                             | Subjects with AU<br>16,237    | Subjects with episcleritis or scleritis<br>12,162    |
| Total<br>127,780                                                             | Total<br>77,072               | Total<br>57,639                                      |
| <i>BMI; Body Mass Index<br/>IAOI; Any IBD associated ocular inflammation</i> |                               |                                                      |

## Appendix 7: Nomogram: prediction of inflammatory bowel disease diagnosis within 3-years of a diagnosis of anterior uveitis

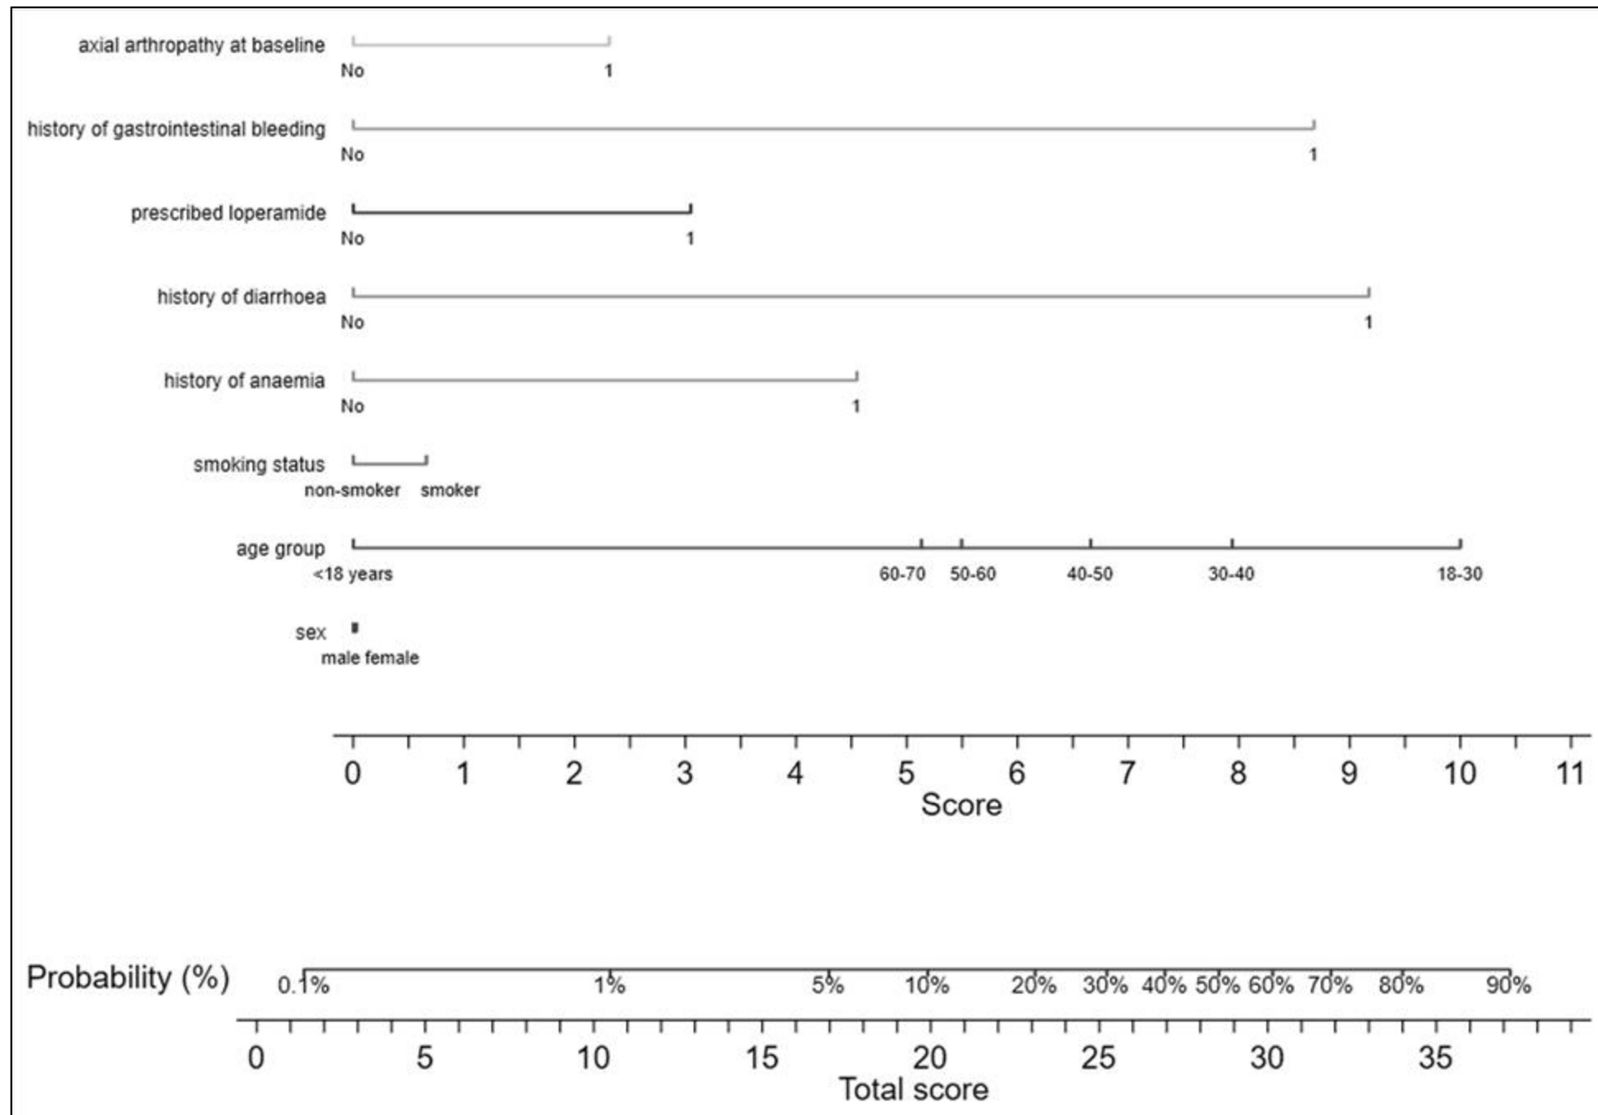

Supplement: bmjopen-2021-052833supp001_data_supplement.pdf [file bmjopen-2021-052833supp001_data_supplement.pdf]
